# Supplementary material for: Screening of high-risk deleterious missense variations in the CYP1B1 gene implicated in the pathogenesis of primary congenital glaucoma: A comprehensive in silico approach
Source: PeerJ. 2022 Nov 30;10:e14132. doi: 10.7717/peerj.14132 (PMC9744154; doi:10.7717/peerj.14132)
Supplement: Supplemental Information 1 [file peerj-10-14132-s001.xlsx]

## Sheet: dbSNP NCBI (610)
#chr	Position	Variation	rs IDs	Gene
2	38071026	G>A,C	rs 4986888	CYP1B1
2	38075207	C>G,T	rs 28936700	CYP1B1
2	38071261	C>A,G,T	rs 55771538	CYP1B1
2	38071185	C>T	rs 56010818	CYP1B1
2	38075070	G>C	rs 56339482	CYP1B1
2	38074704	C>G,T	rs 57865060	CYP1B1
2	38074797	C>T	rs 59472972	CYP1B1
2	38074872	C>A,T	rs 72481807	CYP1B1
2	38071023	C>G,T	rs 72549376	CYP1B1
2	38074431	C>A,G,T	rs 72549382	CYP1B1
2	38074736	T>A,C,G	rs 72549383	CYP1B1
2	38074745	C>A,G	rs 72549384	CYP1B1
2	38075218	C>G,T	rs 72549387	CYP1B1
2	38075387	A>G	rs 72549389	CYP1B1
2	38074695	C>G	rs 104893628	CYP1B1
2	38071087	T>A	rs 104893629	CYP1B1
2	38074902	G>A	rs 104894978	CYP1B1
2	38070945	C>T	rs 104894979	CYP1B1
2	38070764	A>C,G	rs 146770394	CYP1B1
2	38070942	A>G,T	rs 147535955	CYP1B1
2	38071186	G>A,T	rs 148542782	CYP1B1
2	38071009	C>A,G,T	rs 149049138	CYP1B1
2	38074886	C>T	rs 200724605	CYP1B1
2	38071064	G>C	rs 201181935	CYP1B1
2	38075234	G>A	rs 201824781	CYP1B1
2	38074539	G>A	rs 368249322	CYP1B1
2	38075373	T>C	rs 369115487	CYP1B1
2	38075381	G>A,T	rs 372685881	CYP1B1
2	38074688	G>A	rs 375391843	CYP1B1
2	38071024	G>A,C,T	rs 377049098	CYP1B1
2	38075163	G>A,T	rs 377210850	CYP1B1
2	38070948	C>T	rs 747324108	CYP1B1
2	38075022	A>G	rs 769402060	CYP1B1
2	38071035	A>C,G	rs 771737035	CYP1B1
2	38070880	C>G,T	rs 776848093	CYP1B1
2	38074404	C>T	rs 777678299	CYP1B1
2	38071010	C>G,T	rs 781513633	CYP1B1
2	38074974	C>T	rs 886043205	CYP1B1
2	38071152	T>C	rs 886055997	CYP1B1
2	38071052	C>A,T	rs 893198212	CYP1B1
2	38075150	C>A,G,T	rs 899277811	CYP1B1
2	38070761	A>C,G	rs 901961745	CYP1B1
2	38075040	G>A,C	rs 944452644	CYP1B1
2	38075156	G>T	rs 1055845013	CYP1B1
2	38075112	G>A,C	rs 1156997078	CYP1B1
2	38075018	C>A,T	rs 1177366364	CYP1B1
2	38070754	G>T	rs 1216032234	CYP1B1
2	38074571	A>C,T	rs 1357141706	CYP1B1
2	38074580	T>C	rs 1381317977	CYP1B1
2	38074606	G>T	rs 1558603396	CYP1B1
2	38070894	A>G	rs 1682415237	CYP1B1
2	38070928	A>G	rs 1682416281	CYP1B1
2	38071101	G>A	rs 1682424004	CYP1B1
2	38074481	T>G	rs 1682488839	CYP1B1
2	38074677	C>A	rs 1682493984	CYP1B1
2	38074950	C>G	rs 1682502726	CYP1B1
2	38075208	C>T	rs 1682512619	CYP1B1
2	38075247	G>A,C	rs 10012	CYP1B1
2	38075034	C>A	rs 1056827	CYP1B1
2	38071060	G>A,C	rs 1056836	CYP1B1
2	38071007	A>G,T	rs 1056837	CYP1B1
2	38070996	T>C,G	rs 1800440	CYP1B1
2	38075148	A>T	rs 9282671	CYP1B1
2	38070949	G>A	rs 28936701	CYP1B1
2	38071195	C>G,T	rs 55989760	CYP1B1
2	38071251	C>T	rs 79204362	CYP1B1
2	38071234	C>T	rs 104893622	CYP1B1
2	38074626	G>A,T	rs 886055998	CYP1B1
2	38071240	T>A,C	rs 4398252	CYP1B1
2	38075186	T>C	rs 9282670	CYP1B1
2	38075054	G>A	rs 55901431	CYP1B1
2	38071218	G>A	rs 56305281	CYP1B1
2	38075354	G>A,T	rs 61216970	CYP1B1
2	38074769	G>T	rs 72480438	CYP1B1
2	38074517	T>C	rs 72480439	CYP1B1
2	38071252	G>A,C	rs 72480442	CYP1B1
2	38074582	G>A,C	rs 72481805	CYP1B1
2	38071159	T>C	rs 72481806	CYP1B1
2	38071030	G>C	rs 72481808	CYP1B1
2	38070858	T>C	rs 72549372	CYP1B1
2	38071158	A>C	rs 72549378	CYP1B1
2	38071264	C>T	rs 72549379	CYP1B1
2	38075036	G>A,T	rs 73625096	CYP1B1
2	38074947	C>T	rs 111636652	CYP1B1
2	38075121	C>G	rs 112014184	CYP1B1
2	38074445	A>G	rs 112059845	CYP1B1
2	38071050	G>A,C	rs 113974874	CYP1B1
2	38070937	C>T	rs 138388190	CYP1B1
2	38070989	G>A,T	rs 139251365	CYP1B1
2	38074912	C>A,T	rs 142248185	CYP1B1
2	38074589	T>C	rs 144123960	CYP1B1
2	38074663	G>A,T	rs 145142146	CYP1B1
2	38071021	A>G	rs 148233007	CYP1B1
2	38074438	C>A,T	rs 199836011	CYP1B1
2	38071309	A>C,G	rs 200182794	CYP1B1
2	38075007	C>G,T	rs 200998372	CYP1B1
2	38074530	C>T	rs 201544164	CYP1B1
2	38074374	G>A,T	rs 367713104	CYP1B1
2	38071083	T>C	rs 367941075	CYP1B1
2	38074932	G>A,T	rs 368041729	CYP1B1
2	38074817	A>C	rs 368699207	CYP1B1
2	38074451	G>A,C	rs 368794893	CYP1B1
2	38074631	G>A	rs 369088292	CYP1B1
2	38070900	G>C	rs 369311647	CYP1B1
2	38074550	C>T	rs 370006827	CYP1B1
2	38071141	C>T	rs 370488779	CYP1B1
2	38071027	C>G	rs 370691828	CYP1B1
2	38074490	G>A,T	rs 370935810	CYP1B1
2	38074472	C>A,T	rs 372321135	CYP1B1
2	38070739	T>C	rs 372825812	CYP1B1
2	38070920	C>T	rs 373115785	CYP1B1
2	38074368	A>G	rs 373339128	CYP1B1
2	38071016	C>G,T	rs 373896870	CYP1B1
2	38070837	C>T	rs 374261091	CYP1B1
2	38070772	G>T	rs 375422036	CYP1B1
2	38070766	C>G,T	rs 376360685	CYP1B1
2	38070859	C>T	rs 376806358	CYP1B1
2	38074478	G>T	rs 377539363	CYP1B1
2	38074811	G>A,C	rs 529769268	CYP1B1
2	38074983	G>T	rs 538072907	CYP1B1
2	38075189	C>A,G,T	rs 546950847	CYP1B1
2	38071204	A>C	rs 557905773	CYP1B1
2	38075249	A>G	rs 562378505	CYP1B1
2	38075209	G>A,C,T	rs 572392563	CYP1B1
2	38071039	T>C	rs 573739126	CYP1B1
2	38074430	A>G	rs 745318611	CYP1B1
2	38071090	C>T	rs 745785396	CYP1B1
2	38075346	G>T	rs 745893386	CYP1B1
2	38070853	C>T	rs 746179169	CYP1B1
2	38075107	T>C	rs 746372491	CYP1B1
2	38075004	C>A,T	rs 746701169	CYP1B1
2	38074584	T>C	rs 747047052	CYP1B1
2	38070871	C>T	rs 747181523	CYP1B1
2	38075174	A>T	rs 747443528	CYP1B1
2	38075238	G>A	rs 747611859	CYP1B1
2	38075099	A>G	rs 747768543	CYP1B1
2	38071290	C>G	rs 747810555	CYP1B1
2	38074697	A>T	rs 748178111	CYP1B1
2	38075202	C>G	rs 748386900	CYP1B1
2	38074433	T>C	rs 748634651	CYP1B1
2	38074526	G>A	rs 748916597	CYP1B1
2	38074346	C>G	rs 748925506	CYP1B1
2	38074878	G>T	rs 749281337	CYP1B1
2	38074442	T>A	rs 749521942	CYP1B1
2	38075370	G>A	rs 749961213	CYP1B1
2	38075231	C>G	rs 750127463	CYP1B1
2	38074533	C>A,T	rs 750132418	CYP1B1
2	38070798	T>C,G	rs 750220338	CYP1B1
2	38074976	G>A,C	rs 750339876	CYP1B1
2	38075066	A>T	rs 750429709	CYP1B1
2	38071263	A>C,G	rs 750448258	CYP1B1
2	38074665	C>G	rs 750689183	CYP1B1
2	38074752	G>A,T	rs 750823559	CYP1B1
2	38074543	G>C,T	rs 751000368	CYP1B1
2	38070806	A>C	rs 751053349	CYP1B1
2	38074646	T>C	rs 751089072	CYP1B1
2	38074741	G>A,T	rs 751136613	CYP1B1
2	38074382	G>T	rs 751595272	CYP1B1
2	38070994	T>G	rs 751808441	CYP1B1
2	38074839	C>A,G	rs 751918606	CYP1B1
2	38074740	C>G	rs 752091006	CYP1B1
2	38070924	T>C	rs 752142756	CYP1B1
2	38070852	G>A,T	rs 752180003	CYP1B1
2	38074401	C>A,G	rs 752456881	CYP1B1
2	38075226	A>C,T	rs 752472479	CYP1B1
2	38074938	T>A,G	rs 752927055	CYP1B1
2	38074866	G>A,C	rs 752939506	CYP1B1
2	38075378	C>G	rs 753257128	CYP1B1
2	38074460	C>T	rs 753629193	CYP1B1
2	38074958	T>C	rs 753847648	CYP1B1
2	38070782	C>A	rs 753875819	CYP1B1
2	38075047	G>A,C	rs 753937479	CYP1B1
2	38071171	C>G	rs 753971512	CYP1B1
2	38074422	T>A,C	rs 754302280	CYP1B1
2	38070826	T>G	rs 754565922	CYP1B1
2	38075145	C>T	rs 754838099	CYP1B1
2	38071056	T>A	rs 755439631	CYP1B1
2	38075153	C>T	rs 755768400	CYP1B1
2	38074794	C>A,T	rs 756097458	CYP1B1
2	38071069	G>A,C	rs 756276196	CYP1B1
2	38071164	A>T	rs 756363215	CYP1B1
2	38075337	T>C,G	rs 756534145	CYP1B1
2	38074463	T>C	rs 756975982	CYP1B1
2	38075388	T>C	rs 757520959	CYP1B1
2	38074662	C>A,G	rs 757691206	CYP1B1
2	38071006	C>T	rs 758827228	CYP1B1
2	38070943	T>G	rs 758850052	CYP1B1
2	38075165	G>A,C	rs 758852292	CYP1B1
2	38074757	C>T	rs 758886240	CYP1B1
2	38074655	G>A	rs 759095917	CYP1B1
2	38070981	C>A	rs 759196527	CYP1B1
2	38071031	A>T	rs 759284349	CYP1B1
2	38074936	C>T	rs 760025060	CYP1B1
2	38075028	C>T	rs 760115035	CYP1B1
2	38071114	T>A,C	rs 760381965	CYP1B1
2	38075279	T>C,G	rs 760595674	CYP1B1
2	38074454	C>T	rs 760687362	CYP1B1
2	38074513	C>T	rs 760704189	CYP1B1
2	38071248	A>T	rs 760897392	CYP1B1
2	38071134	G>A,T	rs 761190485	CYP1B1
2	38074613	C>A,T	rs 761627618	CYP1B1
2	38075128	G>A,C	rs 762019314	CYP1B1
2	38074370	T>C	rs 762129923	CYP1B1
2	38074629	C>T	rs 762669093	CYP1B1
2	38070898	T>C	rs 762759085	CYP1B1
2	38070972	A>G	rs 762767808	CYP1B1
2	38075139	C>T	rs 762807102	CYP1B1
2	38074377	C>G,T	rs 763154093	CYP1B1
2	38074827	C>A,G,T	rs 763552906	CYP1B1
2	38074823	G>T	rs 763639315	CYP1B1
2	38075228	G>A	rs 763789886	CYP1B1
2	38074458	C>T	rs 764041395	CYP1B1
2	38074515	T>A,C	rs 764056142	CYP1B1
2	38074941	T>C	rs 764095038	CYP1B1
2	38070777	A>G	rs 764153937	CYP1B1
2	38071170	A>G	rs 764181460	CYP1B1
2	38075046	C>G,T	rs 764338357	CYP1B1
2	38075369	G>A	rs 764759660	CYP1B1
2	38071135	T>C	rs 764779087	CYP1B1
2	38074464	G>A	rs 764907266	CYP1B1
2	38070792	G>A	rs 765192369	CYP1B1
2	38075059	C>A,G	rs 765270678	CYP1B1
2	38075129	A>T	rs 765362518	CYP1B1
2	38075336	A>C	rs 765379360	CYP1B1
2	38075375	A>T	rs 765864615	CYP1B1
2	38074542	G>A	rs 765884873	CYP1B1
2	38074634	T>A,C	rs 765972551	CYP1B1
2	38075140	G>C	rs 766303897	CYP1B1
2	38071048	T>G	rs 766732450	CYP1B1
2	38070973	T>C	rs 766872841	CYP1B1
2	38074657	C>A	rs 766983296	CYP1B1
2	38075147	T>C	rs 767413364	CYP1B1
2	38075222	G>A	rs 767431610	CYP1B1
2	38074937	A>C,G	rs 767888657	CYP1B1
2	38071156	G>A	rs 768047511	CYP1B1
2	38071119	T>C	rs 768138533	CYP1B1
2	38075360	G>A	rs 768554943	CYP1B1
2	38074683	C>G	rs 768901314	CYP1B1
2	38075123	A>G,T	rs 768987389	CYP1B1
2	38074361	A>G	rs 769149503	CYP1B1
2	38075105	A>G	rs 769492120	CYP1B1
2	38074620	C>G,T	rs 769699570	CYP1B1
2	38070969	A>G	rs 769873517	CYP1B1
2	38071019	G>A,C	rs 770030868	CYP1B1
2	38074724	C>G	rs 770690506	CYP1B1
2	38071086	T>A	rs 770930904	CYP1B1
2	38074484	T>G	rs 771079700	CYP1B1
2	38070762	C>G	rs 771320442	CYP1B1
2	38074887	C>T	rs 771781154	CYP1B1
2	38071099	C>T	rs 771894894	CYP1B1
2	38074506	C>T	rs 772259541	CYP1B1
2	38075108	A>G	rs 772563612	CYP1B1
2	38074625	C>A,T	rs 772822218	CYP1B1
2	38071222	G>A,C,T	rs 772830856	CYP1B1
2	38071293	G>C	rs 772853286	CYP1B1
2	38070885	T>A	rs 772909671	CYP1B1
2	38070971	C>G	rs 773249406	CYP1B1
2	38074376	G>C,T	rs 773475208	CYP1B1
2	38074441	A>C	rs 773550695	CYP1B1
2	38074799	G>T	rs 774118666	CYP1B1
2	38075250	G>T	rs 774234655	CYP1B1
2	38074448	C>G,T	rs 774324646	CYP1B1
2	38074927	G>A,C	rs 774873997	CYP1B1
2	38071140	G>A	rs 775035231	CYP1B1
2	38070768	A>G	rs 775439857	CYP1B1
2	38075273	A>G	rs 775446879	CYP1B1
2	38075358	A>G,T	rs 775608287	CYP1B1
2	38074512	T>C	rs 775700013	CYP1B1
2	38070868	T>C	rs 775735969	CYP1B1
2	38075109	T>C,G	rs 775748457	CYP1B1
2	38075037	G>A	rs 775866565	CYP1B1
2	38074595	T>A,C,G	rs 776762098	CYP1B1
2	38075126	C>A	rs 776880183	CYP1B1
2	38075199	C>T	rs 776969875	CYP1B1
2	38075106	C>A,G,T	rs 777406996	CYP1B1
2	38075160	G>A,C	rs 777425467	CYP1B1
2	38071045	G>A,C,T	rs 777962233	CYP1B1
2	38075339	G>A,C	rs 777984132	CYP1B1
2	38075385	C>G	rs 778201904	CYP1B1
2	38074549	G>C,T	rs 778202993	CYP1B1
2	38070733	T>A	rs 778203006	CYP1B1
2	38074427	G>C,T	rs 778299704	CYP1B1
2	38074968	A>C	rs 778773307	CYP1B1
2	38074469	T>G	rs 779403682	CYP1B1
2	38070802	C>G	rs 779715125	CYP1B1
2	38075072	G>C,T	rs 779730090	CYP1B1
2	38074992	C>A,G,T	rs 779897170	CYP1B1
2	38075306	G>C	rs 780002791	CYP1B1
2	38070946	A>G,T	rs 780250973	CYP1B1
2	38074767	C>G,T	rs 780536937	CYP1B1
2	38075167	G>A,C	rs 780660283	CYP1B1
2	38071282	C>T	rs 781034244	CYP1B1
2	38074773	T>C	rs 781332540	CYP1B1
2	38075240	G>A	rs 781545195	CYP1B1
2	38075091	C>A,G	rs 867870281	CYP1B1
2	38070957	C>T	rs 868208502	CYP1B1
2	38074973	T>G	rs 899222438	CYP1B1
2	38074830	C>A	rs 903140903	CYP1B1
2	38075171	G>A,C	rs 903413018	CYP1B1
2	38071273	C>G,T	rs 906925939	CYP1B1
2	38075304	C>G	rs 907038281	CYP1B1
2	38071255	C>A	rs 916479886	CYP1B1
2	38074585	G>C	rs 917698020	CYP1B1
2	38071201	G>A	rs 920199421	CYP1B1
2	38075288	T>C	rs 920422544	CYP1B1
2	38074593	G>A	rs 924973247	CYP1B1
2	38074536	G>A,T	rs 927496920	CYP1B1
2	38075015	A>C	rs 932141281	CYP1B1
2	38070988	G>C	rs 932710268	CYP1B1
2	38075295	T>C,G	rs 937119784	CYP1B1
2	38071187	C>T	rs 940036742	CYP1B1
2	38075255	C>T	rs 940591179	CYP1B1
2	38071278	T>G	rs 947487251	CYP1B1
2	38074457	C>G	rs 950785015	CYP1B1
2	38071129	C>A	rs 957253424	CYP1B1
2	38074656	G>A,T	rs 958141746	CYP1B1
2	38070817	G>T	rs 958674114	CYP1B1
2	38075225	A>C,G	rs 965853036	CYP1B1
2	38074904	C>T	rs 971209981	CYP1B1
2	38070883	A>G	rs 971335765	CYP1B1
2	38070889	G>A	rs 977336113	CYP1B1
2	38075043	C>G,T	rs 979313676	CYP1B1
2	38074668	C>G	rs 982484901	CYP1B1
2	38075213	A>G	rs 986356615	CYP1B1
2	38075088	G>C	rs 987358001	CYP1B1
2	38071091	A>C,G	rs 998489422	CYP1B1
2	38075183	G>A	rs 1000395365	CYP1B1
2	38075340	A>G	rs 1000852529	CYP1B1
2	38071108	T>C	rs 1003079068	CYP1B1
2	38074953	G>A,C	rs 1005089897	CYP1B1
2	38075075	T>C	rs 1012784554	CYP1B1
2	38074963	C>A	rs 1015320759	CYP1B1
2	38075203	G>C,T	rs 1027917232	CYP1B1
2	38074633	G>T	rs 1032806404	CYP1B1
2	38071150	C>G	rs 1035845063	CYP1B1
2	38074486	T>G	rs 1037865580	CYP1B1
2	38074565	T>G	rs 1157735525	CYP1B1
2	38074923	A>C,T	rs 1158613221	CYP1B1
2	38070954	T>C	rs 1160355912	CYP1B1
2	38071258	T>C,G	rs 1162824086	CYP1B1
2	38074776	T>C	rs 1162916904	CYP1B1
2	38075151	G>C	rs 1163061699	CYP1B1
2	38074980	A>T	rs 1164996553	CYP1B1
2	38074499	A>G	rs 1166503786	CYP1B1
2	38074509	C>A	rs 1166578570	CYP1B1
2	38071054	A>G	rs 1167943615	CYP1B1
2	38074501	A>T	rs 1172587682	CYP1B1
2	38071059	A>G,T	rs 1172871327	CYP1B1
2	38075063	T>A,C	rs 1175080327	CYP1B1
2	38071229	C>G	rs 1175207652	CYP1B1
2	38074940	C>T	rs 1175827067	CYP1B1
2	38074962	C>A,T	rs 1181867743	CYP1B1
2	38074493	G>C	rs 1183344859	CYP1B1
2	38075058	C>A,T	rs 1184655290	CYP1B1
2	38075024	G>A	rs 1184871440	CYP1B1
2	38074812	G>A	rs 1187028514	CYP1B1
2	38074632	G>C	rs 1190491018	CYP1B1
2	38074907	C>A	rs 1197403176	CYP1B1
2	38074857	C>G,T	rs 1198506525	CYP1B1
2	38071281	G>A	rs 1202021860	CYP1B1
2	38075270	A>C	rs 1204382931	CYP1B1
2	38074863	C>T	rs 1204570375	CYP1B1
2	38075010	A>C	rs 1205100764	CYP1B1
2	38075051	G>T	rs 1205655923	CYP1B1
2	38071040	C>G	rs 1206443598	CYP1B1
2	38074806	G>A	rs 1207273617	CYP1B1
2	38070925	T>C	rs 1209141639	CYP1B1
2	38071071	T>C	rs 1212135470	CYP1B1
2	38071238	C>T	rs 1212636220	CYP1B1
2	38074611	C>G,T	rs 1212671287	CYP1B1
2	38075081	A>C	rs 1215730159	CYP1B1
2	38074686	C>T	rs 1219638928	CYP1B1
2	38075138	A>G	rs 1220681155	CYP1B1
2	38075384	C>G,T	rs 1220917781	CYP1B1
2	38075132	T>C	rs 1221733503	CYP1B1
2	38075180	G>A,C	rs 1223149498	CYP1B1
2	38074897	T>A,G	rs 1224284123	CYP1B1
2	38071034	A>C,G	rs 1227014890	CYP1B1
2	38071224	T>C	rs 1227129956	CYP1B1
2	38074523	G>A,C	rs 1227745440	CYP1B1
2	38075045	G>A	rs 1228223399	CYP1B1
2	38074473	C>T	rs 1228797359	CYP1B1
2	38074847	A>G	rs 1230475780	CYP1B1
2	38074889	T>C	rs 1231038782	CYP1B1
2	38071275	A>G	rs 1233072127	CYP1B1
2	38074751	C>T	rs 1233753551	CYP1B1
2	38075000	C>A	rs 1235696612	CYP1B1
2	38074814	T>A,G	rs 1235928280	CYP1B1
2	38070907	A>G	rs 1238183757	CYP1B1
2	38071301	A>C	rs 1239026154	CYP1B1
2	38074521	G>A	rs 1239156981	CYP1B1
2	38074944	G>A	rs 1241509488	CYP1B1
2	38075006	C>T	rs 1243861259	CYP1B1
2	38074685	A>G	rs 1244105630	CYP1B1
2	38075102	A>T	rs 1244709599	CYP1B1
2	38075216	G>T	rs 1246572114	CYP1B1
2	38071081	A>G	rs 1247053330	CYP1B1
2	38071110	G>A	rs 1249516943	CYP1B1
2	38075052	C>A,T	rs 1255812652	CYP1B1
2	38074494	A>G	rs 1255949601	CYP1B1
2	38070771	A>G	rs 1259536866	CYP1B1
2	38075267	C>G	rs 1261476091	CYP1B1
2	38070829	G>T	rs 1268135305	CYP1B1
2	38070745	G>T	rs 1269167524	CYP1B1
2	38075256	G>A	rs 1270493186	CYP1B1
2	38075176	G>C	rs 1270776713	CYP1B1
2	38070933	T>A	rs 1272381382	CYP1B1
2	38074527	C>G,T	rs 1272655298	CYP1B1
2	38074808	C>A,T	rs 1273390088	CYP1B1
2	38075220	A>G	rs 1273826808	CYP1B1
2	38074467	A>G	rs 1274267612	CYP1B1
2	38071221	A>G	rs 1275572421	CYP1B1
2	38070940	C>G	rs 1278685235	CYP1B1
2	38074859	A>G	rs 1280516869	CYP1B1
2	38075330	T>C	rs 1281285175	CYP1B1
2	38071046	G>C	rs 1282486760	CYP1B1
2	38074674	T>C	rs 1284306323	CYP1B1
2	38074743	G>T	rs 1291501135	CYP1B1
2	38070732	G>C	rs 1292006331	CYP1B1
2	38071079	C>A	rs 1295715584	CYP1B1
2	38074842	G>A,T	rs 1296202698	CYP1B1
2	38074691	C>A	rs 1296663368	CYP1B1
2	38074643	T>C	rs 1296964707	CYP1B1
2	38075082	T>C	rs 1300949434	CYP1B1
2	38074596	T>C	rs 1301192085	CYP1B1
2	38074928	T>C	rs 1301577881	CYP1B1
2	38071063	G>A	rs 1303177290	CYP1B1
2	38074933	C>T	rs 1304882488	CYP1B1
2	38075382	T>C,G	rs 1310162882	CYP1B1
2	38071267	C>G,T	rs 1310420744	CYP1B1
2	38074605	C>T	rs 1310753009	CYP1B1
2	38075041	G>C	rs 1317183889	CYP1B1
2	38074892	A>G	rs 1324041479	CYP1B1
2	38071206	G>T	rs 1325509040	CYP1B1
2	38074824	C>A,G	rs 1326854156	CYP1B1
2	38075268	T>C	rs 1327068745	CYP1B1
2	38071236	C>A,T	rs 1330269956	CYP1B1
2	38070903	A>G	rs 1331226476	CYP1B1
2	38074833	C>T	rs 1332674007	CYP1B1
2	38075386	C>T	rs 1334024815	CYP1B1
2	38075246	C>G	rs 1334319155	CYP1B1
2	38075103	C>T	rs 1336062092	CYP1B1
2	38075333	T>C	rs 1339383528	CYP1B1
2	38074805	G>A	rs 1339939875	CYP1B1
2	38075261	C>G,T	rs 1344079298	CYP1B1
2	38075324	G>C	rs 1344864230	CYP1B1
2	38075120	C>A,T	rs 1347052122	CYP1B1
2	38074737	C>A	rs 1350189107	CYP1B1
2	38075322	G>A	rs 1351091322	CYP1B1
2	38074946	G>A	rs 1355774265	CYP1B1
2	38070987	A>G,T	rs 1358698724	CYP1B1
2	38075175	G>A,C	rs 1361487999	CYP1B1
2	38074845	C>A	rs 1362432989	CYP1B1
2	38074353	A>G	rs 1362569287	CYP1B1
2	38071149	G>A	rs 1365648787	CYP1B1
2	38075118	T>C	rs 1365834549	CYP1B1
2	38075376	G>A,C	rs 1365968474	CYP1B1
2	38074987	G>A,C	rs 1366111120	CYP1B1
2	38074502	A>C	rs 1368501832	CYP1B1
2	38074510	C>T	rs 1372319724	CYP1B1
2	38071242	C>G	rs 1373422312	CYP1B1
2	38074875	T>C	rs 1374128117	CYP1B1
2	38070888	T>C	rs 1383204387	CYP1B1
2	38075214	G>A,C	rs 1384370014	CYP1B1
2	38074415	G>A	rs 1384581880	CYP1B1
2	38074400	G>A	rs 1386966164	CYP1B1
2	38075377	G>A,T	rs 1387526112	CYP1B1
2	38074821	A>G	rs 1389682530	CYP1B1
2	38071120	A>T	rs 1392763888	CYP1B1
2	38075001	G>A	rs 1393322329	CYP1B1
2	38074725	G>C	rs 1401572585	CYP1B1
2	38075127	G>A,C,T	rs 1407122064	CYP1B1
2	38074834	G>T	rs 1407842073	CYP1B1
2	38074738	G>C	rs 1408371802	CYP1B1
2	38071266	A>G	rs 1408481852	CYP1B1
2	38074919	G>A	rs 1409302121	CYP1B1
2	38074949	G>C	rs 1418037931	CYP1B1
2	38074385	A>T	rs 1424195647	CYP1B1
2	38074781	T>C	rs 1426636145	CYP1B1
2	38071165	C>G	rs 1427715645	CYP1B1
2	38074991	G>A	rs 1429075811	CYP1B1
2	38075060	T>G	rs 1429084898	CYP1B1
2	38074910	G>A	rs 1431858226	CYP1B1
2	38074379	G>A,T	rs 1432705914	CYP1B1
2	38070865	G>A	rs 1437655036	CYP1B1
2	38074853	G>A	rs 1437663443	CYP1B1
2	38074734	G>A,T	rs 1439165859	CYP1B1
2	38075166	C>A,T	rs 1439524848	CYP1B1
2	38070775	C>G	rs 1439656374	CYP1B1
2	38074524	G>A	rs 1441119621	CYP1B1
2	38075332	C>A	rs 1445720234	CYP1B1
2	38075196	C>T	rs 1446904975	CYP1B1
2	38071062	G>A	rs 1450206747	CYP1B1
2	38075039	C>T	rs 1450783755	CYP1B1
2	38074979	T>C	rs 1455945430	CYP1B1
2	38074449	G>A,T	rs 1457580106	CYP1B1
2	38070961	C>T	rs 1459526234	CYP1B1
2	38074832	G>C	rs 1462891827	CYP1B1
2	38075057	C>A,T	rs 1464054512	CYP1B1
2	38074881	C>A,T	rs 1469955295	CYP1B1
2	38075190	C>T	rs 1470656398	CYP1B1
2	38074710	G>A	rs 1471490845	CYP1B1
2	38070789	A>G	rs 1474530569	CYP1B1
2	38071257	C>T	rs 1474778122	CYP1B1
2	38070882	C>G	rs 1477055062	CYP1B1
2	38074778	A>G	rs 1478227014	CYP1B1
2	38074491	C>T	rs 1484355793	CYP1B1
2	38074785	C>T	rs 1488240339	CYP1B1
2	38071137	T>G	rs 1558602069	CYP1B1
2	38071144	T>A	rs 1558602076	CYP1B1
2	38074443	C>T	rs 1558603270	CYP1B1
2	38074496	A>T	rs 1558603314	CYP1B1
2	38075285	A>C,T	rs 1558603959	CYP1B1
2	38070793	T>G	rs 1573271881	CYP1B1
2	38070861	T>A	rs 1573271974	CYP1B1
2	38071296	T>G	rs 1573272884	CYP1B1
2	38071299	A>G	rs 1573272890	CYP1B1
2	38074559	A>C	rs 1573275161	CYP1B1
2	38074644	A>C	rs 1573275280	CYP1B1
2	38074782	T>C	rs 1573275482	CYP1B1
2	38074877	A>G	rs 1573275645	CYP1B1
2	38075289	G>A	rs 1573276361	CYP1B1
2	38075321	A>G	rs 1573276398	CYP1B1
2	38075331	G>A,C,T	rs 1573276416	CYP1B1
2	38075363	T>G	rs 1573276482	CYP1B1
2	38070729	C>T	rs 1682411297	CYP1B1
2	38070749	A>C	rs 1682411714	CYP1B1
2	38070765	T>C	rs 1682412018	CYP1B1
2	38070778	T>C	rs 1682412477	CYP1B1
2	38070814	T>C	rs 1682413310	CYP1B1
2	38070823	T>C	rs 1682413442	CYP1B1
2	38070845	C>G	rs 1682413744	CYP1B1
2	38070870	G>A,C	rs 1682414448	CYP1B1
2	38070892	C>G,T	rs 1682415169	CYP1B1
2	38070895	G>C	rs 1682415291	CYP1B1
2	38070904	T>C	rs 1682415688	CYP1B1
2	38070921	A>G	rs 1682415980	CYP1B1
2	38070930	A>G	rs 1682416326	CYP1B1
2	38070953	T>G	rs 1682417596	CYP1B1
2	38070955	T>G	rs 1682417731	CYP1B1
2	38070982	T>C	rs 1682418703	CYP1B1
2	38070995	G>A,C	rs 1682419161	CYP1B1
2	38070997	T>C	rs 1682419499	CYP1B1
2	38071015	C>A	rs 1682420515	CYP1B1
2	38071051	G>T	rs 1682422216	CYP1B1
2	38071068	T>G	rs 1682423021	CYP1B1
2	38071085	G>T	rs 1682423504	CYP1B1
2	38071096	C>G,T	rs 1682423845	CYP1B1
2	38071102	T>C	rs 1682424054	CYP1B1
2	38071107	T>G	rs 1682424156	CYP1B1
2	38071146	G>A	rs 1682425255	CYP1B1
2	38071153	G>A	rs 1682425516	CYP1B1
2	38071161	G>A	rs 1682425808	CYP1B1
2	38071188	A>T	rs 1682426622	CYP1B1
2	38071239	A>G	rs 1682427804	CYP1B1
2	38071256	C>A	rs 1682428697	CYP1B1
2	38071283	C>G	rs 1682429773	CYP1B1
2	38071306	G>C	rs 1682430249	CYP1B1
2	38074380	T>G	rs 1682485886	CYP1B1
2	38074403	C>T	rs 1682486381	CYP1B1
2	38074410	T>C	rs 1682486471	CYP1B1
2	38074418	A>G	rs 1682486663	CYP1B1
2	38074462	G>T	rs 1682487959	CYP1B1
2	38074470	C>T	rs 1682488308	CYP1B1
2	38074475	G>A	rs 1682488584	CYP1B1
2	38074479	C>T	rs 1682488735	CYP1B1
2	38074532	C>T	rs 1682490475	CYP1B1
2	38074541	A>C	rs 1682490803	CYP1B1
2	38074576	G>C	rs 1682491637	CYP1B1
2	38074614	G>A	rs 1682492473	CYP1B1
2	38074617	A>T	rs 1682492562	CYP1B1
2	38074653	A>G	rs 1682493325	CYP1B1
2	38074682	C>G	rs 1682494131	CYP1B1
2	38074701	C>G	rs 1682494638	CYP1B1
2	38074712	C>T	rs 1682494923	CYP1B1
2	38074815	C>G	rs 1682498360	CYP1B1
2	38074819	G>C,T	rs 1682498505	CYP1B1
2	38074826	C>G	rs 1682498803	CYP1B1
2	38074835	C>T	rs 1682499247	CYP1B1
2	38074865	C>T	rs 1682500086	CYP1B1
2	38074873	G>C,T	rs 1682500247	CYP1B1
2	38074890	C>G,T	rs 1682500928	CYP1B1
2	38074901	C>A	rs 1682501221	CYP1B1
2	38074911	G>T	rs 1682501551	CYP1B1
2	38074931	C>T	rs 1682502012	CYP1B1
2	38074942	G>T	rs 1682502417	CYP1B1
2	38074955	C>T	rs 1682502857	CYP1B1
2	38074956	G>A	rs 1682502894	CYP1B1
2	38074965	T>C	rs 1682503157	CYP1B1
2	38074993	C>T	rs 1682503886	CYP1B1
2	38075019	G>A	rs 1682504532	CYP1B1
2	38075027	G>A	rs 1682504801	CYP1B1
2	38075067	C>G	rs 1682506411	CYP1B1
2	38075093	C>T	rs 1682507279	CYP1B1
2	38075094	C>T	rs 1682507319	CYP1B1
2	38075111	G>C	rs 1682507984	CYP1B1
2	38075162	C>T	rs 1682509820	CYP1B1
2	38075192	A>C,G	rs 1682511402	CYP1B1
2	38075223	C>T	rs 1682513641	CYP1B1
2	38075237	G>A	rs 1682514504	CYP1B1
2	38075277	G>A	rs 1682516162	CYP1B1
2	38075313	G>C	rs 1682516859	CYP1B1
2	38075327	G>A	rs 1682517147	CYP1B1
2	38075357	C>A	rs 1682518152	CYP1B1
2	38071033	C>G	rs 4986887	CYP1B1
2	38074772	C>T	rs 9341248	CYP1B1
2	38074592	C>A,T	rs 9341250	CYP1B1
2	38071044	G>A,T	rs 56175199	CYP1B1
2	38074356	G>A,C	rs 66583685	CYP1B1
2	38070738	T>C,G	rs 72549371	CYP1B1

## Sheet: SIFT
SNP	ORGANISM_BUILD	CHR	COORDINATE	REF_ALLELE	ALT_ALLELE	AMINO_ACID_CHANGE	GENE_NAME	GENE_ID	TRANSCRIPT_ID	PROTEIN_ID	REGION	SIFT_SCORE	SIFT_MEDIAN	NO_OF_SEQS_AT_POSITION	SIFT_PREDICTION	AVG_ALLELE_FREQ	EAS_ALLELE_FREQ	AMR_ALLELE_FREQ	AFR_ALLELE_FREQ	EUR_ALLELE_FREQ	SAS_ALLELE_FREQ
rs10012	Homo_sapiens/GRCh37.74	2	38302390	G	C	R48G	CYP1B1	ENSG00000138061	ENST00000260630	ENSP00000260630	CDS	0.295	2.94	30	TOLERATED	0.375	0.181	0.301	0.574	0.29	0.444
rs1056827	Homo_sapiens/GRCh37.74	2	38302177	C	A	A119S	CYP1B1	ENSG00000138061	ENST00000260630	ENSP00000260630	CDS	0.157	2.79	53	TOLERATED	0.362	0.18	0.311	0.523	0.289	0.445
rs1056836	Homo_sapiens/GRCh37.74	2	38298203	C	G	V432L	CYP1B1	ENSG00000138061	ENST00000260630	ENSP00000260630	CDS	0.342	2.79	71	TOLERATED	0.615	0.909	0.723	0.183	0.602	0.831
rs1056837	Homo_sapiens/GRCh37.74	2	38298150	A	T	D449E	CYP1B1	ENSG00000138061	ENST00000260630	ENSP00000260630	CDS	0.332	2.74	68	TOLERATED
rs1800440	Homo_sapiens/GRCh37.74	2	38298139	T	C	N453S	CYP1B1	ENSG00000138061	ENST00000260630	ENSP00000260630	CDS	0.008	2.79	66	DELETERIOUS	0.1	0.005	0.131	0.007	0.196	0.201
rs4986888	Homo_sapiens/GRCh37.74	2	38298169	G	C	A443G	CYP1B1	ENSG00000138061	ENST00000260630	ENSP00000260630	CDS	0.293	2.73	69	TOLERATED	0.016	0	0.004	0.055	0.003	0
rs9282671	Homo_sapiens/GRCh37.74	2	38302291	A	T	Y81N	CYP1B1	ENSG00000138061	ENST00000260630	ENSP00000260630	CDS	0	2.79	49	DELETERIOUS	0.002	0	0.001	0.001	0.007	0.002
rs28936700	Homo_sapiens/GRCh37.74	2	38302350	C	T	G61E	CYP1B1	ENSG00000138061	ENST00000260630	ENSP00000260630	CDS	0	2.86	46	DELETERIOUS
rs28936701	Homo_sapiens/GRCh37.74	2	38298092	G	A	R469W	CYP1B1	ENSG00000138061	ENST00000260630	ENSP00000260630	CDS	0	2.79	65	DELETERIOUS
rs55771538	Homo_sapiens/GRCh37.74	2	38298404	C	A	G365W	CYP1B1	ENSG00000138061	ENST00000260630	ENSP00000260630	CDS	0	2.73	71	DELETERIOUS
rs55771538	Homo_sapiens/GRCh37.74	2	38298404	C	G	G365R	CYP1B1	ENSG00000138061	ENST00000260630	ENSP00000260630	CDS	0.003	2.73	71	DELETERIOUS
rs55989760	Homo_sapiens/GRCh37.74	2	38298338	C	G	E387Q	CYP1B1	ENSG00000138061	ENST00000260630	ENSP00000260630	CDS	0	2.78	69	DELETERIOUS
rs55989760	Homo_sapiens/GRCh37.74	2	38298338	C	T	E387K	CYP1B1	ENSG00000138061	ENST00000260630	ENSP00000260630	CDS	0	2.78	69	DELETERIOUS
rs56010818	Homo_sapiens/GRCh37.74	2	38298328	C	T	R390H	CYP1B1	ENSG00000138061	ENST00000260630	ENSP00000260630	CDS	0.001	2.79	70	DELETERIOUS
rs56339482	Homo_sapiens/GRCh37.74	2	38302213	G	C	L107V	CYP1B1	ENSG00000138061	ENST00000260630	ENSP00000260630	CDS	0	2.78	52	DELETERIOUS	0	0.002	0	0	0	0
rs57865060	Homo_sapiens/GRCh37.74	2	38301847	C	T	E229K	CYP1B1	ENSG00000138061	ENST00000260630	ENSP00000260630	CDS	0.123	2.77	54	TOLERATED	0.01	0	0.003	0	0.004	0.047
rs72549382	Homo_sapiens/GRCh37.74	2	38301574	C	A	V320L	CYP1B1	ENSG00000138061	ENST00000260630	ENSP00000260630	CDS	0.091	2.76	55	TOLERATED	0.001	0.003	0	0	0	0
rs72549383	Homo_sapiens/GRCh37.74	2	38301879	T	A	D218V	CYP1B1	ENSG00000138061	ENST00000260630	ENSP00000260630	CDS	0.001	2.78	54	DELETERIOUS
rs72549387	Homo_sapiens/GRCh37.74	2	38302361	C	G	W57C	CYP1B1	ENSG00000138061	ENST00000260630	ENSP00000260630	CDS	0.001	2.86	46	DELETERIOUS
rs72549389	Homo_sapiens/GRCh37.74	2	38302530	A	G	M1T	CYP1B1	ENSG00000138061	ENST00000260630	ENSP00000260630	CDS	0	3.8	9	DELETERIOUS (WARNING LOW CONFIDENCE)
rs79204362	Homo_sapiens/GRCh37.74	2	38298394	C	T	R368H	CYP1B1	ENSG00000138061	ENST00000260630	ENSP00000260630	CDS	0.01	2.73	70	DELETERIOUS	0.004	0	0	0	0.002	0.019
rs104893622	Homo_sapiens/GRCh37.74	2	38298377	C	T	D374N	CYP1B1	ENSG00000138061	ENST00000260630	ENSP00000260630	CDS	0.006	2.72	70	DELETERIOUS
rs104893628	Homo_sapiens/GRCh37.74	2	38301838	C	G	G232R	CYP1B1	ENSG00000138061	ENST00000260630	ENSP00000260630	CDS	0.022	2.77	54	DELETERIOUS
rs104893629	Homo_sapiens/GRCh37.74	2	38298230	T	A	N423Y	CYP1B1	ENSG00000138061	ENST00000260630	ENSP00000260630	CDS	0.001	2.79	70	DELETERIOUS
rs104894978	Homo_sapiens/GRCh37.74	2	38302045	G	A	R163C	CYP1B1	ENSG00000138061	ENST00000260630	ENSP00000260630	CDS	0.028	2.79	51	DELETERIOUS
rs104894979	Homo_sapiens/GRCh37.74	2	38298088	C	T	C470Y	CYP1B1	ENSG00000138061	ENST00000260630	ENSP00000260630	CDS	0	2.79	65	DELETERIOUS
rs146770394	Homo_sapiens/GRCh37.74	2	38297907	A	C	D530E	CYP1B1	ENSG00000138061	ENST00000260630	ENSP00000260630	CDS	0.211	3.25	30	TOLERATED
rs147535955	Homo_sapiens/GRCh37.74	2	38298085	A	G	I471T	CYP1B1	ENSG00000138061	ENST00000260630	ENSP00000260630	CDS	0.006	2.79	65	DELETERIOUS
rs148542782	Homo_sapiens/GRCh37.74	2	38298329	G	A	R390C	CYP1B1	ENSG00000138061	ENST00000260630	ENSP00000260630	CDS	0	2.79	70	DELETERIOUS
rs200724605	Homo_sapiens/GRCh37.74	2	38302029	C	T	G168D	CYP1B1	ENSG00000138061	ENST00000260630	ENSP00000260630	CDS	0.536	2.79	52	TOLERATED	0	0	0	0	0.001	0
rs201181935	Homo_sapiens/GRCh37.74	2	38298207	G	C	D430E	CYP1B1	ENSG00000138061	ENST00000260630	ENSP00000260630	CDS	0.002	2.79	71	DELETERIOUS	0	0.001	0	0	0	0
rs201824781	Homo_sapiens/GRCh37.74	2	38302377	G	A	P52L	CYP1B1	ENSG00000138061	ENST00000260630	ENSP00000260630	CDS	0	2.93	43	DELETERIOUS
rs369115487	Homo_sapiens/GRCh37.74	2	38302516	T	C	S6G	CYP1B1	ENSG00000138061	ENST00000260630	ENSP00000260630	CDS	0.584	3.53	11	TOLERATED
rs372685881	Homo_sapiens/GRCh37.74	2	38302524	G	T	T3N	CYP1B1	ENSG00000138061	ENST00000260630	ENSP00000260630	CDS	0.014	3.45	12	DELETERIOUS
rs4398252	Homo_sapiens/GRCh37.74	2	38298383	T	C	M372V	CYP1B1	ENSG00000138061	ENST00000260630	ENSP00000260630	CDS	0.34	2.73	71	TOLERATED
rs4986887	Homo_sapiens/GRCh37.74	2	38298176	C	G	D441H	CYP1B1	ENSG00000138061	ENST00000260630	ENSP00000260630	CDS	0.012	2.73	70	DELETERIOUS
rs9282670	Homo_sapiens/GRCh37.74	2	38302329	T	C	Q68R	CYP1B1	ENSG00000138061	ENST00000260630	ENSP00000260630	CDS	0.459	2.87	48	TOLERATED
rs9341248	Homo_sapiens/GRCh37.74	2	38301915	C	T	S206N	CYP1B1	ENSG00000138061	ENST00000260630	ENSP00000260630	CDS	0.169	2.79	53	TOLERATED
rs9341250	Homo_sapiens/GRCh37.74	2	38301735	C	A	R266L	CYP1B1	ENSG00000138061	ENST00000260630	ENSP00000260630	CDS	0.257	2.78	57	TOLERATED
rs55901431	Homo_sapiens/GRCh37.74	2	38302197	G	A	S112L	CYP1B1	ENSG00000138061	ENST00000260630	ENSP00000260630	CDS	0.413	2.79	53	TOLERATED
rs56175199	Homo_sapiens/GRCh37.74	2	38298187	G	A	P437L	CYP1B1	ENSG00000138061	ENST00000260630	ENSP00000260630	CDS	0	2.73	71	DELETERIOUS	0	0.001	0	0	0	0
rs56305281	Homo_sapiens/GRCh37.74	2	38298361	G	A	P379L	CYP1B1	ENSG00000138061	ENST00000260630	ENSP00000260630	CDS	0.037	2.72	69	DELETERIOUS
rs59472972	Homo_sapiens/GRCh37.74	2	38301940	C	T	V198I	CYP1B1	ENSG00000138061	ENST00000260630	ENSP00000260630	CDS	0.333	2.79	51	TOLERATED
rs61216970	Homo_sapiens/GRCh37.74	2	38302497	G	A	P12L	CYP1B1	ENSG00000138061	ENST00000260630	ENSP00000260630	CDS	0.39	3.15	16	TOLERATED	0.002	0	0.004	0.004	0	0
rs66583685	Homo_sapiens/GRCh37.74	2	38301499	G	A	L345F	CYP1B1	ENSG00000138061	ENST00000260630	ENSP00000260630	CDS	0.178	2.74	64	TOLERATED	0	0	0	0.001	0	0
rs72480438	Homo_sapiens/GRCh37.74	2	38301912	G	T	A207D	CYP1B1	ENSG00000138061	ENST00000260630	ENSP00000260630	CDS	0.007	2.79	53	DELETERIOUS
rs72480439	Homo_sapiens/GRCh37.74	2	38301660	T	C	D291G	CYP1B1	ENSG00000138061	ENST00000260630	ENSP00000260630	CDS	0.015	2.77	55	DELETERIOUS
rs72480442	Homo_sapiens/GRCh37.74	2	38298395	G	A	R368C	CYP1B1	ENSG00000138061	ENST00000260630	ENSP00000260630	CDS	0	2.73	70	DELETERIOUS	0	0	0.001	0	0	0
rs72481806	Homo_sapiens/GRCh37.74	2	38298302	T	C	I399V	CYP1B1	ENSG00000138061	ENST00000260630	ENSP00000260630	CDS	0.025	2.78	69	DELETERIOUS
rs72481807	Homo_sapiens/GRCh37.74	2	38302015	C	T	E173K	CYP1B1	ENSG00000138061	ENST00000260630	ENSP00000260630	CDS	0	2.79	51	DELETERIOUS
rs72481808	Homo_sapiens/GRCh37.74	2	38298173	G	C	P442A	CYP1B1	ENSG00000138061	ENST00000260630	ENSP00000260630	CDS	0.022	2.73	69	DELETERIOUS
rs72549372	Homo_sapiens/GRCh37.74	2	38298001	T	C	E499G	CYP1B1	ENSG00000138061	ENST00000260630	ENSP00000260630	CDS	0.032	2.82	54	DELETERIOUS
rs72549376	Homo_sapiens/GRCh37.74	2	38298166	C	T	R444Q	CYP1B1	ENSG00000138061	ENST00000260630	ENSP00000260630	CDS	0.003	2.73	69	DELETERIOUS
rs72549378	Homo_sapiens/GRCh37.74	2	38298301	A	C	I399S	CYP1B1	ENSG00000138061	ENST00000260630	ENSP00000260630	CDS	0	2.78	69	DELETERIOUS
rs72549379	Homo_sapiens/GRCh37.74	2	38298407	C	T	V364M	CYP1B1	ENSG00000138061	ENST00000260630	ENSP00000260630	CDS	0.002	2.73	71	DELETERIOUS
rs72549384	Homo_sapiens/GRCh37.74	2	38301888	C	A	S215I	CYP1B1	ENSG00000138061	ENST00000260630	ENSP00000260630	CDS	0.047	2.79	53	DELETERIOUS	0	0.001	0	0	0	0
rs73625096	Homo_sapiens/GRCh37.74	2	38302179	G	A	P118L	CYP1B1	ENSG00000138061	ENST00000260630	ENSP00000260630	CDS	0	2.79	53	DELETERIOUS
rs111636652	Homo_sapiens/GRCh37.74	2	38302090	C	T	A148T	CYP1B1	ENSG00000138061	ENST00000260630	ENSP00000260630	CDS	0.07	2.79	52	TOLERATED
rs112014184	Homo_sapiens/GRCh37.74	2	38302264	C	G	G90R	CYP1B1	ENSG00000138061	ENST00000260630	ENSP00000260630	CDS	0	2.79	53	DELETERIOUS
rs112059845	Homo_sapiens/GRCh37.74	2	38301588	A	G	L315P	CYP1B1	ENSG00000138061	ENST00000260630	ENSP00000260630	CDS	0.156	2.77	52	TOLERATED
rs113974874	Homo_sapiens/GRCh37.74	2	38298193	G	A	P435L	CYP1B1	ENSG00000138061	ENST00000260630	ENSP00000260630	CDS	0.284	2.73	71	TOLERATED
rs138388190	Homo_sapiens/GRCh37.74	2	38298080	C	T	E473K	CYP1B1	ENSG00000138061	ENST00000260630	ENSP00000260630	CDS	0.057	2.79	63	TOLERATED	0	0.001	0	0.001	0	0
rs142248185	Homo_sapiens/GRCh37.74	2	38302055	C	A	Q159H	CYP1B1	ENSG00000138061	ENST00000260630	ENSP00000260630	CDS	0.098	2.86	51	TOLERATED	0	0.002	0	0	0	0
rs144123960	Homo_sapiens/GRCh37.74	2	38301732	T	C	N267S	CYP1B1	ENSG00000138061	ENST00000260630	ENSP00000260630	CDS	0.034	2.78	57	DELETERIOUS
rs148233007	Homo_sapiens/GRCh37.74	2	38298164	A	G	F445L	CYP1B1	ENSG00000138061	ENST00000260630	ENSP00000260630	CDS	0	2.73	69	DELETERIOUS
rs149049138	Homo_sapiens/GRCh37.74	2	38298152	C	T	D449N	CYP1B1	ENSG00000138061	ENST00000260630	ENSP00000260630	CDS	0.82	2.74	68	TOLERATED
rs200182794	Homo_sapiens/GRCh37.74	2	38298452	A	C	Y349D	CYP1B1	ENSG00000138061	ENST00000260630	ENSP00000260630	CDS	0.022	2.73	68	DELETERIOUS
rs200998372	Homo_sapiens/GRCh37.74	2	38302150	C	T	G128S	CYP1B1	ENSG00000138061	ENST00000260630	ENSP00000260630	CDS	0.07	2.79	52	TOLERATED
rs201544164	Homo_sapiens/GRCh37.74	2	38301673	C	T	A287T	CYP1B1	ENSG00000138061	ENST00000260630	ENSP00000260630	CDS	0.622	2.89	52	TOLERATED	0.001	0.006	0	0	0	0
rs367713104	Homo_sapiens/GRCh37.74	2	38301517	G	T	L339M	CYP1B1	ENSG00000138061	ENST00000260630	ENSP00000260630	CDS	0.121	2.74	62	TOLERATED
rs367941075	Homo_sapiens/GRCh37.74	2	38298226	T	C	Q424R	CYP1B1	ENSG00000138061	ENST00000260630	ENSP00000260630	CDS	0.008	2.79	71	DELETERIOUS
rs368041729	Homo_sapiens/GRCh37.74	2	38302075	G	A	R153C	CYP1B1	ENSG00000138061	ENST00000260630	ENSP00000260630	CDS	0	2.79	52	DELETERIOUS
rs368249322	Homo_sapiens/GRCh37.74	2	38301682	G	A	R284W	CYP1B1	ENSG00000138061	ENST00000260630	ENSP00000260630	CDS	0.011	2.89	51	DELETERIOUS
rs368699207	Homo_sapiens/GRCh37.74	2	38301960	A	C	L191R	CYP1B1	ENSG00000138061	ENST00000260630	ENSP00000260630	CDS	0.003	2.78	50	DELETERIOUS	0	0.001	0	0	0	0
rs368794893	Homo_sapiens/GRCh37.74	2	38301594	G	A	A313V	CYP1B1	ENSG00000138061	ENST00000260630	ENSP00000260630	CDS	0.412	2.79	40	TOLERATED
rs369088292	Homo_sapiens/GRCh37.74	2	38301774	G	A	P253L	CYP1B1	ENSG00000138061	ENST00000260630	ENSP00000260630	CDS	0.002	2.91	55	DELETERIOUS
rs369311647	Homo_sapiens/GRCh37.74	2	38298043	G	C	S485C	CYP1B1	ENSG00000138061	ENST00000260630	ENSP00000260630	CDS	0.003	2.79	61	DELETERIOUS
rs370006827	Homo_sapiens/GRCh37.74	2	38301693	C	T	C280Y	CYP1B1	ENSG00000138061	ENST00000260630	ENSP00000260630	CDS	0.145	2.78	53	TOLERATED
rs370488779	Homo_sapiens/GRCh37.74	2	38298284	C	T	A405T	CYP1B1	ENSG00000138061	ENST00000260630	ENSP00000260630	CDS	0.852	2.78	70	TOLERATED
rs370691828	Homo_sapiens/GRCh37.74	2	38298170	C	G	A443P	CYP1B1	ENSG00000138061	ENST00000260630	ENSP00000260630	CDS	0.212	2.73	69	TOLERATED
rs370935810	Homo_sapiens/GRCh37.74	2	38301633	G	T	A300E	CYP1B1	ENSG00000138061	ENST00000260630	ENSP00000260630	CDS	0.278	2.78	54	TOLERATED
rs372321135	Homo_sapiens/GRCh37.74	2	38301615	C	T	G306E	CYP1B1	ENSG00000138061	ENST00000260630	ENSP00000260630	CDS	0.236	2.85	34	TOLERATED	0	0	0	0.002	0	0
rs372825812	Homo_sapiens/GRCh37.74	2	38297882	T	C	K539E	CYP1B1	ENSG00000138061	ENST00000260630	ENSP00000260630	CDS	1	3.55	20	TOLERATED
rs373115785	Homo_sapiens/GRCh37.74	2	38298063	C	T	M478I	CYP1B1	ENSG00000138061	ENST00000260630	ENSP00000260630	CDS	0.761	2.79	62	TOLERATED
rs373339128	Homo_sapiens/GRCh37.74	2	38301511	A	G	W341R	CYP1B1	ENSG00000138061	ENST00000260630	ENSP00000260630	CDS	0	2.74	64	DELETERIOUS
rs374261091	Homo_sapiens/GRCh37.74	2	38297980	C	T	S506N	CYP1B1	ENSG00000138061	ENST00000260630	ENSP00000260630	CDS	0.449	2.91	54	TOLERATED
rs375391843	Homo_sapiens/GRCh37.74	2	38301831	G	A	T234M	CYP1B1	ENSG00000138061	ENST00000260630	ENSP00000260630	CDS	0.001	2.77	54	DELETERIOUS
rs375422036	Homo_sapiens/GRCh37.74	2	38297915	G	T	L528I	CYP1B1	ENSG00000138061	ENST00000260630	ENSP00000260630	CDS	0.029	3.22	31	DELETERIOUS
rs376360685	Homo_sapiens/GRCh37.74	2	38297909	C	G	D530H	CYP1B1	ENSG00000138061	ENST00000260630	ENSP00000260630	CDS	0.006	3.25	30	DELETERIOUS
rs376806358	Homo_sapiens/GRCh37.74	2	38298002	C	T	E499K	CYP1B1	ENSG00000138061	ENST00000260630	ENSP00000260630	CDS	0.317	2.82	54	TOLERATED
rs377210850	Homo_sapiens/GRCh37.74	2	38302306	G	T	R76S	CYP1B1	ENSG00000138061	ENST00000260630	ENSP00000260630	CDS	0.016	2.79	49	DELETERIOUS
rs377539363	Homo_sapiens/GRCh37.74	2	38301621	G	T	A304E	CYP1B1	ENSG00000138061	ENST00000260630	ENSP00000260630	CDS	1	2.86	36	TOLERATED

## Sheet: PolyPhen 2.0
rsID	AMINO_ACID_CHANGE	HumDiv_Score	Prediction	HumVar_Score	Prediction
rs10012	R48G	0	Benign	0	Benign
rs1056827	A119S	0	Benign	0	Benign
rs1056836	V432L	0.001	Benign	0.006	Benign
rs1056837	D449E	0.003	Benign	0.005	Benign
rs1800440	N453S	0.569	Possibly Damaging	0.306	Benign
rs4986888	A443G	0	Benign	0.002	Benign
rs9282671	Y81N	1	Possibly Damaging	0.998	Probably Damaging
rs28936700	G61E	1	Probably Damaging	1	Probably Damaging
rs28936701	R469W	1	Probably Damaging	1	Probably Damaging
rs55771538	G365W	1	Probably Damaging	0.998	Probably Damaging
rs55771538	G365R	1	Probably Damaging	0.991	Probably Damaging
rs55989760	E387Q	1	Probably Damaging	1	Probably Damaging
rs55989760	E387K	1	Probably Damaging	1	Probably Damaging
rs56010818	R390H	1	Probably Damaging	1	Probably Damaging
rs56339482	L107V	1	Probably Damaging	1	Probably Damaging
rs57865060	E229K	0.781	Possibly Damaging	0.139	Benign
rs72549382	V320L	0.918	Possibly Damaging	0.696	Possibly Damaging
rs72549383	D218V	0.939	Possibly Damaging	0.891	Possibly Damaging
rs72549387	W57C	1	Probably Damaging	0.999	Probably Damaging
rs72549389	M1T	0.948	Possibly Damaging	0.614	Possibly Damaging
rs79204362	R368H	1	Probably Damaging	0.978	Probably Damaging
rs104893622	D374N	0.998	Probably Damaging	0.981	Probably Damaging
rs104893628	G232R	1	Probably Damaging	1	Probably Damaging
rs104893629	N423Y	1	Probably Damaging	1	Probably Damaging
rs104894978	R163C	0.234	Benign	0.041	Benign
rs104894979	C470Y	1	Probably Damaging	1	Probably Damaging
rs146770394	D530E	0.005	Benign	0.004	Benign
rs147535955	I471T	1	Probably Damaging	0.999	Probably Damaging
rs148542782	R390C	1	Probably Damaging	1	Probably Damaging
rs200724605	G168D	0.137	Benign	0.031	Benign
rs201181935	D430E	0.991	Probably Damaging	0.922	Probably Damaging
rs201824781	P52L	1	Probably Damaging	1	Probably Damaging
rs369115487	S6G	0.001	Benign	0.001	Benign
rs372685881	T3N	0.007	Benign	0.005	Benign
rs4398252	M372V	0.001	Benign	0.004	Benign
rs4986887	D441H	0.988	Probably Damaging	0.908	Possibly Damaging
rs9282670	Q68R	0	Benign	0.004	Benign
rs9341248	S206N	1	Probably Damaging	0.996	Probably Damaging
rs9341250	R266L	0.015	Benign	0.01	Benign
rs55901431	S112L	0.008	Benign	0.002	Benign
rs56175199	P437L	1	Probably Damaging	1	Probably Damaging
rs56305281	P379L	0.852	Possibly Damaging	0.523	Possibly Damaging
rs59472972	V198I	0.005	Benign	0.005	Benign
rs61216970	P12L	0.002	Benign	0.001	Benign
rs66583685	L345F	0.081	Benign	0.217	Benign
rs72480438	A207D	1	Probably Damaging	0.999	Probably Damaging
rs72480439	D291G	0.998	Probably Damaging	0.985	Probably Damaging
rs72480442	R368C	1	Probably Damaging	0.996	Probably Damaging
rs72481806	I399V	0.921	Possibly Damaging	0.742	Possibly Damaging
rs72481807	E173K	1	Probably Damaging	1	Probably Damaging
rs72481808	P442A	1	Probably Damaging	1	Probably Damaging
rs72549372	E499G	0.971	Probably Damaging	0.732	Possibly Damaging
rs72549376	R444Q	1	Probably Damaging	1	Probably Damaging
rs72549378	I399S	1	Probably Damaging	0.996	Probably Damaging
rs72549379	V364M	0.999	Probably Damaging	0.975	Probably Damaging
rs72549384	S215I	0.891	Possibly Damaging	0.734	Possibly Damaging
rs73625096	P118L	1	Probably Damaging	1	Probably Damaging
rs111636652	A148T	0.676	Possibly Damaging	0.468	Possibly Damaging
rs112014184	G90R	1	Probably Damaging	1	Probably Damaging
rs112059845	L315P	0.97	Probably Damaging	0.856	Possibly Damaging
rs113974874	P435L	0.058	Benign	0.069	Benign
rs138388190	E473K	0.995	Probably Damaging	0.852	Possibly Damaging
rs142248185	Q159H	0	Benign	0.001	Benign
rs144123960	N267S	0.071	Benign	0.021	Benign
rs148233007	F445L	1	Probably Damaging	1	Probably Damaging
rs149049138	D449N	0	Benign	0.002	Benign
rs200182794	Y349D	0.991	Probably Damaging	0.917	Probably Damaging
rs200998372	G128S	0.797	Possibly Damaging	0.478	Possibly Damaging
rs201544164	A287T	0.949	Possibly Damaging	0.363	Benign
rs367713104	L339M	0.918	Possibly Damaging	0.879	Possibly Damaging
rs367941075	Q424R	1	Probably Damaging	1	Probably Damaging
rs368041729	R153C	1	Probably Damaging	0.995	Probably Damaging
rs368249322	R284W	0.997	Probably Damaging	0.783	Possibly Damaging
rs368699207	L191R	0.97	Probably Damaging	0.882	Possibly Damaging
rs368794893	A313V	0.007	Benign	0.008	Benign
rs369088292	P253L	1	Probably Damaging	1	Probably Damaging
rs369311647	S485C	1	Probably Damaging	0.996	Probably Damaging
rs370006827	C280Y	0.483	Possibly Damaging	0.078	Benign
rs370488779	A405T	0	Benign	0.001	Benign
rs370691828	A443P	0.51	Possibly Damaging	0.359	Benign
rs370935810	A300E	0.999	Probably Damaging	0.97	Probably Damaging
rs372321135	G306E	0.003	Benign	0.002	Benign
rs372825812	K539E	0	Benign	0	Benign
rs373115785	M478I	0.001	Benign	0.008	Benign
rs373339128	W341R	1	Probably Damaging	1	Probably Damaging
rs374261091	S506N	0	Benign	0.009	Benign
rs375391843	T234M	1	Probably Damaging	1	Probably Damaging
rs375422036	L528I	0	Benign	0.018	Benign
rs376360685	D530H	0.992	Probably Damaging	0.73	Possibly Damaging
rs376806358	E499K	0.994	Benign	0.112	Benign
rs377210850	R76S	0.963	Probably Damaging	0.782	Possibly Damaging
rs377539363	A304E	0.001	Benign	0.002	Benign

## Sheet: PROVEAN
	Variant	score	Prediction (cutoff= -2.5)
	R48G	-0.09	Neutral
	A119S	1.52	Neutral
	V432L	-0.42	Neutral
	D449E	-1.61	Neutral
	N453S	-3.45	Deleterious
	A443G	-1.11	Neutral
	Y81N	-7.68	Deleterious
	G61E	-6.60	Deleterious
	R469W	-7.28	Deleterious
	G365W	-6.34	Deleterious
	G365R	-6.24	Deleterious
	E387Q	-2.91	Deleterious
	E387K	-3.88	Deleterious
	R390H	-4.85	Deleterious
	L107V	-2.48	Neutral
	E229K	-2.47	Neutral
	V320L	-1.96	Neutral
	D218V	-7.54	Deleterious
	W57C	-8.05	Deleterious
	M1T	-1.34	Neutral
	R368H	-4.59	Deleterious
	D374N	-4.74	Deleterious
	G232R	-4.40	Deleterious
	N423Y	-7.62	Deleterious
	R163C	-2.44	Neutral
	C470Y	-10.10	Deleterious
	D530E	-0.56	Neutral
	I471T	-4.52	Deleterious
	R390C	-7.76	Deleterious
	G168D	1.31	Neutral
	D430E	-3.57	Deleterious
	P52L	-6.33	Deleterious
	S6G	-0.60	Neutral
	T3N	-0.60	Neutral
	M372V	0.22	Neutral
	D441H	-3.10	Deleterious
	Q68R	-0.10	Neutral
	S206N	-1.99	Neutral
	R266L	-2.93	Deleterious
	S112L	-1.87	Neutral
	P437L	-9.47	Deleterious
	P379L	-8.35	Deleterious
	V198I	-0.66	Neutral
	P12L	0.47	Neutral
	L345F	-0.22	Neutral
	A207D	-4.65	Deleterious
	D291G	-6.30	Deleterious
	R368C	-7.34	Deleterious
	I399V	-0.96	Neutral
	E173K	-3.25	Deleterious
	P442A	-7.53	Deleterious
	E499G	-4.00	Deleterious
	R444Q	-3.77	Deleterious
	I399S	-5.69	Deleterious
	V364M	-2.47	Neutral
	S215I	-3.85	Deleterious
	P118L	-8.41	Deleterious
	A148T	-3.17	Deleterious
	G90R	-6.94	Deleterious
	L315P	-3.05	Deleterious
	P435L	-1.92	Neutral
	E473K	-3.30	Deleterious
	Q159H	-0.07	Neutral
	N267S	-1.03	Neutral
	F445L	-5.66	Deleterious
	D449N	-1.71	Neutral
	Y349D	-6.45	Deleterious
	G128S	-1.44	Neutral
	A287T	0.17	Neutral
	L339M	-1.24	Neutral
	Q424R	-3.81	Deleterious
	R153C	-6.03	Deleterious
	R284W	-2.06	Neutral
	L191R	-2.29	Neutral
	A313V	1.01	Neutral
	P253L	-6.66	Deleterious
	S485C	-2.16	Neutral
	C280Y	3.08	Neutral
	A405T	0.42	Neutral
	A443P	-1.24	Neutral
	A300E	-1.55	Neutral
	G306E	0.31	Neutral
	K539E	0.79	Neutral
	M478I	-0.48	Neutral
	W341R	-13.06	Deleterious
	S506N	-0.45	Neutral
	T234M	-3.26	Deleterious
	L528I	-0.62	Neutral
	D530H	-1.92	Neutral
	E499K	-1.70	Neutral
	R76S	-3.08	Deleterious
	A304E	0.25	Neutral

## Sheet: PANTHER
substitution	HMM	preservation	message
R48G	PTHR24299	possibly damaging	0.5
A119S	PTHR24299	possibly damaging	0.5
V432L	PTHR24299	NA	NA
D449E	PTHR24299	probably damaging	0.57
N453S	PTHR24299	probably damaging	0.57
A443G	PTHR24299	possibly damaging	0.5
Y81N	PTHR24299	probably damaging	0.85
G61E	PTHR24299	probably damaging	0.85
R469W	PTHR24299	probably damaging	0.74
G365W	PTHR24299	probably damaging	0.85
G365R	PTHR24299	probably damaging	0.85
E387Q	PTHR24299	probably damaging	0.85
E387K	PTHR24299	probably damaging	0.85
R390H	PTHR24299	probably damaging	0.85
L107V	PTHR24299	probably damaging	0.74
E229K	PTHR24299	possibly damaging	0.5
V320L	PTHR24299	possibly damaging	0.5
D218V	PTHR24299	probably damaging	0.74
W57C	PTHR24299	possibly damaging	0.5
M1T	PTHR24299	possibly damaging	0.5
R368H	PTHR24299	probably damaging	0.85
D374N	PTHR24299	probably damaging	0.85
G232R	PTHR24299	probably damaging	0.57
N423Y	PTHR24299	probably damaging	0.85
R163C	PTHR24299	possibly damaging	0.5
C470Y	PTHR24299	probably damaging	0.85
D530E	PTHR24299	possibly damaging	0.5
I471T	PTHR24299	probably damaging	0.57
R390C	PTHR24299	probably damaging	0.85
G168D	PTHR24299	possibly damaging	0.5
D430E	PTHR24299	probably damaging	0.85
P52L	PTHR24299	probably damaging	0.85
S6G	PTHR24299	possibly damaging	0.5
T3N	PTHR24299	possibly damaging	0.5
M372V	PTHR24299	possibly damaging	0.5
D441H	PTHR24299	possibly damaging	0.5
Q68R	PTHR24299	possibly damaging	0.5
S206N	PTHR24299	possibly damaging	0.5
R266L	PTHR24299	possibly damaging	0.5
S112L	PTHR24299	possibly damaging	0.5
P437L	PTHR24299	probably damaging	0.85
P379L	PTHR24299	probably damaging	0.85
V198I	PTHR24299	probably damaging	0.57
P12L	PTHR24299	possibly damaging	0.5
L345F	PTHR24299	possibly damaging	0.5
A207D	PTHR24299	possibly damaging	0.5
D291G	PTHR24299	probably damaging	0.85
R368C	PTHR24299	probably damaging	0.85
I399V	PTHR24299	probably damaging	0.74
E173K	PTHR24299	probably damaging	0.78
P442A	PTHR24299	probably damaging	0.85
E499G	PTHR24299	possibly damaging	0.5
R444Q	PTHR24299	probably damaging	0.85
I399S	PTHR24299	probably damaging	0.74
V364M	PTHR24299	possibly damaging	0.5
S215I	PTHR24299	possibly damaging	0.5
P118L	PTHR24299	probably damaging	0.85
A148T	PTHR24299	probably damaging	0.74
G90R	PTHR24299	probably damaging	0.85
L315P	PTHR24299	probably damaging	0.57
P435L	PTHR24299	possibly damaging	0.5
E473K	PTHR24299	probably damaging	0.57
Q159H	PTHR24299	possibly damaging	0.5
N267S	PTHR24299	possibly damaging	0.5
F445L	PTHR24299	probably damaging	0.85
D449N	PTHR24299	probably damaging	0.57
Y349D	PTHR24299	probably damaging	0.74
G128S	PTHR24299	possibly damaging	0.5
A287T	PTHR24299	possibly damaging	0.5
L339M	PTHR24299	probably damaging	0.74
Q424R	PTHR24299	probably damaging	0.74
R153C	PTHR24299	possibly damaging	0.5
R284W	PTHR24299	possibly damaging	0.5
L191R	PTHR24299	possibly damaging	0.5
A313V	PTHR24299	possibly damaging	0.5
P253L	PTHR24299	possibly damaging	0.5
S485C	PTHR24299	possibly damaging	0.5
C280Y	PTHR24299	possibly damaging	0.5
A405T	PTHR24299	possibly damaging	0.5
A443P	PTHR24299	possibly damaging	0.5
A300E	PTHR24299	possibly damaging	0.5
G306E	PTHR24299	possibly damaging	0.5
K539E	PTHR24299	possibly damaging	0.5
M478I	PTHR24299	possibly damaging	0.5
W341R	PTHR24299	probably damaging	0.85
S506N	PTHR24299	possibly damaging	0.5
T234M	PTHR24299	possibly damaging	0.5
L528I	PTHR24299	possibly damaging	0.5
D530H	PTHR24299	possibly damaging	0.5
E499K	PTHR24299	possibly damaging	0.5
R76S	PTHR24299	possibly damaging	0.5
A304E	PTHR24299	possibly damaging	0.5

## Sheet: SNAP2
Variant	Predicted Effect	Score	Expected Accuracy
M1T	effect	29	0.63
T3N	neutral	-50	0.72
S6G	neutral	-73	0.87
P12L	neutral	-76	0.87
R48G	effect	53	0.75
P52L	effect	58	0.75
W57C	effect	51	0.75
G61E	effect	90	0.95
Q68R	neutral	-94	0.97
R76S	neutral	-42	0.72
Y81N	effect	97	0.95
G90R	effect	91	0.95
L107V	effect	12	0.59
S112L	neutral	-80	0.87
P118L	effect	73	0.85
A119S	neutral	-83	0.93
G128S	neutral	-35	0.66
A148T	neutral	-17	0.57
R153C	effect	23	0.63
Q159H	neutral	-38	0.66
R163C	effect	27	0.63
G168D	neutral	-72	0.87
E173K	effect	84	0.91
L191R	effect	31	0.66
V198I	neutral	-27	0.61
S206N	effect	23	0.63
A207D	effect	72	0.85
S215I	neutral	-8	0.53
D218V	effect	45	0.71
E229K	effect	72	0.85
G232R	neutral	-5	0.53
T234M	neutral	-31	0.66
P253L	neutral	-1	0.53
R266L	neutral	-59	0.78
N267S	neutral	-83	0.93
C280Y	neutral	-94	0.97
R284W	effect	26	0.63
A287T	neutral	-93	0.97
D291G	effect	84	0.91
A300E	neutral	-52	0.78
A304E	neutral	-91	0.97
G306E	neutral	-65	0.82
A313V	neutral	-91	0.97
L315P	effect	65	0.8
V320L	effect	82	0.91
L339M	neutral	-94	0.97
W341R	effect	78	0.85
L345F	effect	16	0.59
Y349D	effect	38	0.66
V364M	effect	86	0.91
G365R	effect	72	0.85
G365W	effect	75	0.85
R368C	effect	92	0.95
R368H	effect	90	0.95
M372V	neutral	-81	0.93
D374N	effect	59	0.75
P379L	effect	31	0.66
E387Q	effect	89	0.91
E387K	effect	94	0.95
R390C	effect	93	0.95
R390H	effect	99	0.95
I399S	effect	46	0.71
I399V	neutral	-44	0.72
A405T	neutral	-95	0.97
N423Y	effect	89	0.91
Q424R	effect	62	0.8
D430E	effect	59	0.75
V432L	neutral	-85	0.93
P435L	neutral	-75	0.87
P437L	effect	80	0.91
D441H	neutral	-21	0.61
P442A	effect	34	0.66
A443G	neutral	-36	0.66
A443P	neutral	-61	0.82
R444Q	effect	69	0.8
F445L	effect	93	0.95
D449N	neutral	-93	0.97
D449E	neutral	-89	0.93
N453S	neutral	-70	0.82
R469W	effect	98	0.95
C470Y	effect	89	0.91
I471T	effect	28	0.63
E473K	effect	25	0.63
M478I	neutral	-71	0.87
S485C	neutral	-2	0.53
E499G	neutral	-81	0.93
E499K	neutral	-87	0.93
S506N	neutral	-95	0.97
L528I	neutral	-45	0.72
D530E	neutral	-75	0.87
D530H	effect	12	0.59
K539E	neutral	-76	0.87

## Sheet: PhD-SNP
SNP	Variant	RI (Reliability Index)	Prediction
rs10012	R48G	7	Neutral
rs1056827	A119S	8	Neutral
rs1056836	V432L	6	Neutral
rs1056837	D449E	8	Neutral
rs1800440	N453S	7	Neutral
rs4986888	A443G	8	Neutral
rs9282671	Y81N	4	Neutral
rs28936700	G61E	6	Disease
rs28936701	R469W	6	Disease
rs55771538	G365W	8	Disease
rs55771538	G365R	8	Disease
rs55989760	E387Q	7	Neutral
rs55989760	E387K	1	Neutral
rs56010818	R390H	5	Neutral
rs56339482	L107V	1	Disease
rs57865060	E229K	5	Disease
rs72549382	V320L	5	Neutral
rs72549383	D218V	1	Disease
rs72549387	W57C	1	Neutral
rs72549389	M1T	7	Neutral
rs79204362	R368H	6	Disease
rs104893622	D374N	5	Disease
rs104893628	G232R	4	Disease
rs104893629	N423Y	7	Disease
rs104894978	R163C	1	Disease
rs104894979	C470Y	8	Disease
rs146770394	D530E	7	Neutral
rs147535955	I471T	5	Neutral
rs148542782	R390C	0	Neutral
rs200724605	G168D	6	Neutral
rs201181935	D430E	6	Disease
rs201824781	P52L	4	Disease
rs369115487	S6G	9	Neutral
rs372685881	T3N	9	Neutral
rs4398252	M372V	3	Neutral
rs4986887	D441H	6	Neutral
rs9282670	Q68R	5	Neutral
rs9341248	S206N	7	Neutral
rs9341250	R266L	2	Disease
rs55901431	S112L	4	Neutral
rs56175199	P437L	1	Neutral
rs56305281	P379L	1	Disease
rs59472972	V198I	7	Neutral
rs61216970	P12L	9	Neutral
rs66583685	L345F	6	Neutral
rs72480438	A207D	4	Neutral
rs72480439	D291G	4	Disease
rs72480442	R368C	8	Disease
rs72481806	I399V	9	Neutral
rs72481807	E173K	6	Disease
rs72481808	P442A	2	Disease
rs72549372	E499G	1	Neutral
rs72549376	R444Q	5	Disease
rs72549378	I399S	7	Neutral
rs72549379	V364M	5	Disease
rs72549384	S215I	4	Neutral
rs73625096	P118L	1	Disease
rs111636652	A148T	8	Neutral
rs112014184	G90R	8	Disease
rs112059845	L315P	8	Disease
rs113974874	P435L	6	Neutral
rs138388190	E473K	8	Disease
rs142248185	Q159H	6	Neutral
rs144123960	N267S	6	Neutral
rs148233007	F445L	6	Disease
rs149049138	D449N	7	Neutral
rs200182794	Y349D	1	Disease
rs200998372	G128S	3	Neutral
rs201544164	A287T	8	Neutral
rs367713104	L339M	4	Disease
rs367941075	Q424R	3	Neutral
rs368041729	R153C	3	Disease
rs368249322	R284W	6	Disease
rs368699207	L191R	2	Disease
rs368794893	A313V	6	Neutral
rs369088292	P253L	2	Disease
rs369311647	S485C	5	Neutral
rs370006827	C280Y	0	Neutral
rs370488779	A405T	6	Neutral
rs370691828	A443P	2	Disease
rs370935810	A300E	0	Disease
rs372321135	G306E	5	Disease
rs372825812	K539E	10	Neutral
rs373115785	M478I	1	Disease
rs373339128	W341R	1	Neutral
rs374261091	S506N	2	Neutral
rs375391843	T234M	2	Neutral
rs375422036	L528I	7	Neutral
rs376360685	D530H	6	Neutral
rs376806358	E499K	4	Disease
rs377210850	R76S	7	Neutral
rs377539363	A304E	1	Disease

## Sheet: Predict SNP1
Variant	PredictSNP prediction	PredictSNP expected accuracy
M1T	NEUTRAL	0.628313
T3N	DELETERIOUS	0.606973
S6G	NEUTRAL	0.752914
P12L	NEUTRAL	0.826225
R48G	NEUTRAL	0.738345
P52L	DELETERIOUS	0.869084
W57C	DELETERIOUS	0.755661
G61E	DELETERIOUS	0.869084
Q68R	NEUTRAL	0.826225
R76S	NEUTRAL	0.826225
Y81N	DELETERIOUS	0.755661
G90R	DELETERIOUS	0.869084
L107V	DELETERIOUS	0.869084
S112L	NEUTRAL	0.826225
P118L	DELETERIOUS	0.869084
A119S	NEUTRAL	0.826225
G128S	NEUTRAL	0.738345
A148T	NEUTRAL	0.738345
R153C	DELETERIOUS	0.869084
Q159H	NEUTRAL	0.826225
R163C	NEUTRAL	0.653073
G168D	NEUTRAL	0.826225
E173K	DELETERIOUS	0.869084
L191R	DELETERIOUS	0.606973
V198I	NEUTRAL	0.826225
S206N	NEUTRAL	0.752914
A207D	DELETERIOUS	0.605483
S215I	DELETERIOUS	0.549464
D218V	DELETERIOUS	0.654946
E229K	NEUTRAL	0.628313
G232R	DELETERIOUS	0.755661
T234M	NEUTRAL	0.602564
P253L	DELETERIOUS	0.718713
R266L	NEUTRAL	0.75204
N267S	NEUTRAL	0.738345
C280Y	NEUTRAL	0.826225
R284W	DELETERIOUS	0.606973
A287T	NEUTRAL	0.826225
D291G	DELETERIOUS	0.869084
A300E	DELETERIOUS	0.549464
A304E	NEUTRAL	0.736888
G306E	NEUTRAL	0.752914
A313V	NEUTRAL	0.826225
L315P	DELETERIOUS	0.755661
V320L	NEUTRAL	0.738345
L339M	NEUTRAL	0.602564
W341R	DELETERIOUS	0.789035
L345F	NEUTRAL	0.826225
Y349D	DELETERIOUS	0.869084
V364M	DELETERIOUS	0.755661
G365R	DELETERIOUS	0.869084
G365W	DELETERIOUS	0.869084
R368C	DELETERIOUS	0.605483
R368H	DELETERIOUS	0.869084
M372V	NEUTRAL	0.826225
D374N	DELETERIOUS	0.718713
P379L	DELETERIOUS	0.755661
E387Q	DELETERIOUS	0.789035
E387K	DELETERIOUS	0.718713
R390C	DELETERIOUS	0.755661
R390H	DELETERIOUS	0.789035
I399S	NEUTRAL	0.75204
I399V	NEUTRAL	0.602564
A405T	NEUTRAL	0.826225
N423Y	DELETERIOUS	0.869084
Q424R	DELETERIOUS	0.718713
D430E	DELETERIOUS	0.869084
V432L	NEUTRAL	0.826225
P435L	NEUTRAL	0.826225
P437L	DELETERIOUS	0.755661
D441H	NEUTRAL	0.75204
P442A	DELETERIOUS	0.869084
A443G	NEUTRAL	0.738345
A443P	DELETERIOUS	0.521454
R444Q	DELETERIOUS	0.869084
F445L	DELETERIOUS	0.869084
D449N	NEUTRAL	0.826225
D449E	NEUTRAL	0.826225
N453S	NEUTRAL	0.738345
R469W	DELETERIOUS	0.606973
C470Y	DELETERIOUS	0.869084
I471T	DELETERIOUS	0.549464
E473K	DELETERIOUS	0.605483
M478I	NEUTRAL	0.736888
S485C	DELETERIOUS	0.505959
E499G	NEUTRAL	0.738345
E499K	NEUTRAL	0.752914
S506N	NEUTRAL	0.826225
L528I	NEUTRAL	0.75204
D530E	NEUTRAL	0.826225
D530H	DELETERIOUS	0.654946
K539E	NEUTRAL	0.826225
