# Supplementary material for: Screening of high-risk deleterious missense variations in the CYP1B1 gene implicated in the pathogenesis of primary congenital glaucoma: A comprehensive in silico approach
Source: PeerJ. 2022 Nov 30;10:e14132. doi: 10.7717/peerj.14132 (PMC9744154; doi:10.7717/peerj.14132)
Supplement: Supplemental Information 2 [file peerj-10-14132-s002.xlsx]

## Sheet: Sheet1
CYP1B1
I-Mutatnt 2.0				Mupro
Variant	DDG	Reliability Index (RI)	Stability	Variant	DDG	Stability
G61E	-0.2	2	Increase	R48G	-1.29454	Decrease
R469W	-0.75	6	Decrease	A119S	-0.828087	Decrease
G365W	-0.66	7	Decrease	V432L	-0.58086451	Decrease
G365R	-1.02	6	Decrease	D449E	-1.53411	Decrease
R368H	-1.53	9	Decrease	N453S	-0.96641629	Decrease
D374N	-0.74	5	Decrease	A443G	-1.2146765	Decrease
N423Y	0.02	1	Decrease	Y81N	-1.4104976	Decrease
C470Y	0.33	2	Decrease	G61E	-0.133842	Decrease
D430E	-0.46	1	Increase	R469W	-0.57773413	Decrease
P52L	0.59	3	Decrease	G365W	-0.60664224	Decrease
D291G	-1.26	3	Decrease	G365R	-0.5027749	Decrease
R368C	-0.8	7	Decrease	E387Q	-0.172218	Decrease
E173K	-0.24	5	Decrease	E387K	-0.52481716	Decrease
P442A	-1.07	7	Decrease	R390H	-1.1832298	Decrease
R444Q	-1.39	9	Decrease	L107V	-1.24315	Decrease
P118L	0.68	2	Increase	E229K	-1.19424	Decrease
G90R	-1.56	8	Decrease	V320L	-0.884455	Decrease
F445L	-2.41	8	Decrease	D218V	-0.525246	Decrease
Y349D	-0.03	0	Increase	W57C	-1.09113	Decrease
R48G	0.08	5	Decrease	M1T	-1.78685	Decrease
A119S	-0.45	9	Decrease	R368H	-0.70885364	Decrease
V432L	-0.8	3	Decrease	D374N	-0.620895	Decrease
D449E	-0.61	3	Decrease	G232R	-0.896788	Decrease
N453S	0.26	5	Decrease	N423Y	-0.75074921	Decrease
A443G	-0.46	6	Decrease	R163C	-0.58896482	Decrease
Y81N	-1.27	6	Decrease	C470Y	-1.11159	Decrease
E387Q	-0.45	5	Decrease	D530E	-0.567298	Decrease
E387K	-1.14	5	Decrease	I471T	-2.0831602	Decrease
R390H	-2.84	9	Decrease	R390C	-0.8397035	Decrease
L107V	-1.29	8	Decrease	G168D	-0.54527389	Decrease
E229K	-1.02	7	Decrease	D430E	-0.91953937	Decrease
V320L	-1.76	7	Decrease	P52L	0.47050071	Increase
D218V	-0.08	1	Increase	S6G	-1.6966967	Decrease
W57C	-0.48	3	Decrease	T3N	-0.833476	Decrease
M1T	-0.37	6	Decrease	M372V	-1.0876723	Decrease
G232R	-1.09	6	Decrease	D441H	-1.0490767	Decrease
R163C	-1	4	Decrease	Q68R	-0.273691	Decrease
D530E	0.45	6	Increase	S206N	-0.527794	Decrease
I471T	-2.14	8	Decrease	R266L	-0.436727	Decrease
R390C	-1.46	3	Decrease	S112L	0.12676382	Increase
G168D	-0.1	4	Decrease	P437L	0.26328272	Increase
S6G	-0.67	6	Decrease	P379L	-0.803232	Decrease
T3N	-0.72	4	Decrease	V198I	-0.382172	Decrease
M372V	-0.33	7	Decrease	P12L	0.107584	Increase
D441H	-1.14	5	Decrease	L345F	-1.59333	Decrease
Q68R	-0.14	0	Increase	A207D	-0.75279966	Decrease
S206N	0.07	2	Increase	D291G	-2.0927999	Decrease
R266L	-0.76	8	Decrease	R368C	-0.590443	Decrease
S112L	1.85	7	Increase	I399V	-0.668953	Decrease
P437L	-0.08	4	Decrease	E173K	-0.99836319	Decrease
P379L	-1.22	6	Decrease	P442A	-0.720202	Decrease
V198I	-1.2	8	Decrease	E499G	-1.614378	Decrease
P12L	-1.07	5	Decrease	R444Q	-1.35055	Decrease
L345F	-0.83	6	Decrease	I399S	-1.56561	Decrease
A207D	-0.46	3	Decrease	V364M	-0.640759	Decrease
I399V	-0.02	5	Decrease	S215I	-0.938053	Decrease
E499G	-1.03	4	Decrease	P118L	-0.1230999	Decrease
I399S	-2.79	9	Decrease	A148T	-1.4859069	Decrease
V364M	-1.7	8	Decrease	G90R	-0.606161	Decrease
S215I	-0.3	2	Increase	L315P	-2.3139298	Decrease
A148T	-1.36	8	Decrease	P435L	0.0328227	Increase
L315P	-2.11	6	Decrease	E473K	-1.20117	Decrease
P435L	-0.1	3	Decrease	Q159H	-1.00447	Decrease
E473K	-0.87	6	Decrease	N267S	-1.7986726	Decrease
Q159H	-1.01	7	Decrease	F445L	-0.85636	Decrease
N267S	-0.69	5	Decrease	D449N	-1.81513	Decrease
D449N	-1.97	7	Decrease	Y349D	-1.23929	Decrease
G128S	-0.41	6	Decrease	G128S	-0.848062	Decrease
A287T	-1.12	7	Decrease	A287T	-0.471238	Decrease
L339M	-0.82	2	Decrease	L339M	-0.766752	Decrease
Q424R	-0.4	4	Increase	Q424R	-0.98024156	Decrease
R153C	0.17	2	Increase	R153C	-0.831723	Decrease
R284W	-0.59	7	Decrease	R284W	-0.98866641	Decrease
L191R	-3.16	8	Decrease	L191R	-1.12841	Decrease
A313V	0.05	1	Increase	A313V	-0.36673163	Decrease
P253L	1.19	0	Decrease	P253L	0.015621317	Increase
S485C	-1.57	2	Decrease	S485C	-0.718554	Decrease
C280Y	-0.09	3	Decrease	C280Y	-0.669226	Decrease
A405T	-0.43	3	Decrease	A405T	-0.796723	Decrease
A443P	-2.56	0	Decrease	A443P	-1.02849	Decrease
A300E	-1.79	7	Decrease	A300E	-0.676498	Decrease
G306E	-0.47	2	Increase	G306E	-0.791717	Decrease
K539E	-0.29	2	Decrease	K539E	0.345522	Decrease
M478I	-0.37	4	Decrease	M478I	-0.931658	Decrease
W341R	-1.15	3	Decrease	W341R	-0.588996	Decrease
S506N	-0.34	2	Decrease	S506N	-0.882665	Decrease
T234M	-0.03	2	Decrease	T234M	0.0781202	Increase
L528I	-0.49	7	Decrease	L528I	-0.936938	Decrease
D530H	-0.12	2	Decrease	D530H	-1.00558	Decrease
E499K	-0.92	8	Decrease	E499K	-1.111075	Decrease
R76S	-2.09	8	Decrease	R76S	-1.18458	Decrease
A304E	-0.66	6	Decrease	A304E	-0.69087297	Decrease
