# Supplementary material for: Screening of high-risk deleterious missense variations in the CYP1B1 gene implicated in the pathogenesis of primary congenital glaucoma: A comprehensive in silico approach
Source: PeerJ. 2022 Nov 30;10:e14132. doi: 10.7717/peerj.14132 (PMC9744154; doi:10.7717/peerj.14132)
Supplement: Supplemental Information 3 [file peerj-10-14132-s003.xlsx]

## Sheet: Biological Processes
Term	P-value
omega-hydroxylase P450 pathway (GO:0097267)	0.000499986
negative regulation of cell adhesion mediated by integrin (GO:0033629)	0.000499986
membrane lipid catabolic process (GO:0046466)	0.000499986
intrinsic apoptotic signaling pathway in response to oxidative stress (GO:0008631)	0.000599984
retinal metabolic process (GO:0042574)	0.000699982
nitric oxide biosynthetic process (GO:0006809)	0.000749981
nitric oxide metabolic process (GO:0046209)	0.000799981
epoxygenase P450 pathway (GO:0019373)	0.000949978
retinol metabolic process (GO:0042572)	0.00104998
membrane lipid metabolic process (GO:0006643)	0.00109998
positive regulation of vascular endothelial growth factor production (GO:0010575)	0.00124997
cellular lipid catabolic process (GO:0044242)	0.00134997
camera-type eye development (GO:0043010)	0.00134997
regulation of vascular endothelial growth factor production (GO:0010574)	0.00134997
estrogen metabolic process (GO:0008210)	0.00149997
cellular nitrogen compound biosynthetic process (GO:0044271)	0.00154997
positive regulation of receptor signaling pathway via STAT (GO:1904894)	0.00159997
primary alcohol metabolic process (GO:0034308)	0.00164997
positive regulation of receptor signaling pathway via JAK-STAT (GO:0046427)	0.00164997
regulation of cell adhesion mediated by integrin (GO:0033628)	0.00169997
cellular response to hydrogen peroxide (GO:0070301)	0.00174997
endothelial cell migration (GO:0043542)	0.00194996
epithelial cell migration (GO:0010631)	0.00204996
regulation of receptor signaling pathway via JAK-STAT (GO:0046425)	0.00224996
regulation of cellular metabolic process (GO:0031323)	0.00234996
response to hydrogen peroxide (GO:0042542)	0.00244996
unsaturated fatty acid metabolic process (GO:0033559)	0.00269995
blood vessel morphogenesis (GO:0048514)	0.00279995
regulation of reactive oxygen species metabolic process (GO:2000377)	0.00284995
icosanoid metabolic process (GO:0006690)	0.00284995
arachidonic acid metabolic process (GO:0019369)	0.00284995
response to organic cyclic compound (GO:0014070)	0.00299995
cellular response to reactive oxygen species (GO:0034614)	0.00314995
sterol metabolic process (GO:0016125)	0.00349995
negative regulation of cell adhesion (GO:0007162)	0.00364995
negative regulation of NF-kappaB transcription factor activity (GO:0032088)	0.00394994
long-chain fatty acid metabolic process (GO:0001676)	0.00414994
collagen fibril organization (GO:0030199)	0.00444994
retinoid metabolic process (GO:0001523)	0.00459994
intrinsic apoptotic signaling pathway (GO:0097193)	0.00509993
positive regulation of vasculature development (GO:1904018)	0.00509993
steroid metabolic process (GO:0008202)	0.00519993
negative regulation of cell motility (GO:2000146)	0.00569993
positive regulation of angiogenesis (GO:0045766)	0.00579993
cellular response to organic substance (GO:0071310)	0.00614992
negative regulation of DNA-binding transcription factor activity (GO:0043433)	0.00714992
negative regulation of cell migration (GO:0030336)	0.00719992
cellular response to organic cyclic compound (GO:0071407)	0.00749991
regulation of angiogenesis (GO:0045765)	0.0101499
positive regulation of programmed cell death (GO:0043068)	0.0142999
extracellular matrix organization (GO:0030198)	0.0149999
positive regulation of apoptotic process (GO:0043065)	0.0154999
positive regulation of cytokine production (GO:0001819)	0.0167499
supramolecular fiber organization (GO:0097435)	0.0175499
negative regulation of cell population proliferation (GO:0008285)	0.0189499
regulation of cell migration (GO:0030334)	0.0203999
negative regulation of cellular process (GO:0048523)	0.0282998
regulation of apoptotic process (GO:0042981)	0.0370998
regulation of cell population proliferation (GO:0042127)	0.0381998

## Sheet: Molecular Functions
Term	P-value
estrogen 16-alpha-hydroxylase activity (GO:0101020)	0.000399988
oxidoreductase activity, acting on paired donors, with incorporation or reduction of molecular oxygen, reduced flavin or flavoprotein as one donor, and incorporation of one atom of oxygen (GO:0016712)	0.000999977
steroid hydroxylase activity (GO:0008395)	0.00179997
heme binding (GO:0020037)	0.00454994

## Sheet: Cellular Components
Term	P-value
endoplasmic reticulum membrane (GO:0005789)	0.0355998
intracellular membrane-bounded organelle (GO:0043231)	0.2596
