# Supplementary material for: Screening of high-risk deleterious missense variations in the CYP1B1 gene implicated in the pathogenesis of primary congenital glaucoma: A comprehensive in silico approach
Source: PeerJ. 2022 Nov 30;10:e14132. doi: 10.7717/peerj.14132 (PMC9744154; doi:10.7717/peerj.14132)
Supplement: Supplemental Information 4 [file peerj-10-14132-s004.xlsx]

## Sheet: KEGG
Term	P-value	Adjusted P-value	Old P-value	Old Adjusted P-value	Odds Ratio	Combined Score	Genes
Tryptophan metabolism	0.00209996	0.00569992	0	0	19958	123058	CYP1B1
Ovarian steroidogenesis	0.00254996	0.00569992	0	0	19949	119129	CYP1B1
Steroid hormone biosynthesis	0.00304995	0.00569992	0	0	19939	115499	CYP1B1
Metabolism of xenobiotics by cytochrome P450	0.00379994	0.00569992	0	0	19924	111032	CYP1B1
Chemical carcinogenesis	0.0119499	0.0143399	0	0	19761	87482.6	CYP1B1
MicroRNAs in cancer	0.0154999	0.0154999	0	0	19690	82046.7	CYP1B1
